# Supplementary material for: Red Cell Distribution Width and Patient Outcome in Cardiovascular Disease: A ‘’Real-World’’ Analysis
Source: MDPI journal article supplement (doi:10.3390/jcdd8100120), 2021-09-26
Supplement: s1 [file s1]

**Supplementary Table S1 adjusted Cox regression analysis for all cause death. A) Model 1, adjusted for age and reduced LVEF (<40%) B) Model 2, adjusted for age, reduced LVEF and reduced eGFR (< 60 mL/min calculated with CKDEPI) C) Model 3, adjusted for age, reduced LVEF, reduced eGFR, Hb and RBC.**

**A) Model 1**

|                                   | HR   | 95,0% CI |       | p value   |
|-----------------------------------|------|----------|-------|-----------|
|                                   |      | Lower    | Upper |           |
| Age                               | 1.07 | 1.05     | 1.09  | p< 0.001  |
| Reduced LVEF                      | 1.22 | 0.83     | 1.79  | p = 0.311 |
| Lowest RDW tertile ( <i>ref</i> ) |      |          |       |           |
| Intermediate RDW tertile          | 1.02 | 0.59     | 1.77  | p = 0.942 |
| Highest RDW tertile               | 3.36 | 2.06     | 5.46  | p < 0.001 |

**B) Model 2**

|                                   | HR   | 95,0% CI |       | p value   |
|-----------------------------------|------|----------|-------|-----------|
|                                   |      | Lower    | Upper |           |
| Age                               | 1.05 | 1.03     | 1.07  | p < 0.001 |
| Reduced LVEF                      | 1.12 | 0.77     | 1.65  | p = 0.548 |
| Lowest RDW tertile ( <i>ref</i> ) |      |          |       |           |
| Intermediate RDW tertile          | 0.89 | 0.52     | 1.56  | p = 0.699 |
| Highest RDW tertile               | 2.7  | 1.64     | 4.44  | p < 0.001 |
| Reduced eGFR                      | 2.49 | 1.72     | 3.58  | p < 0.001 |

**C) Model 3**

|                                   | HR   | 95,0% CI |       | p value   |
|-----------------------------------|------|----------|-------|-----------|
|                                   |      | Lower    | Upper |           |
| Age                               | 1.05 | 1.03     | 1.07  | p < 0.001 |
| Reduced LVEF                      | 1.11 | 0.75     | 1.6   | 0.604     |
| Lowest RDW tertile ( <i>ref</i> ) |      |          |       |           |
| Intermediate RDW tertile          | 0.92 | 0.52     | 1.6   | p = 0.763 |
| Highest RDW tertile               | 2.73 | 1.63     | 4.56  | p < 0.001 |
| Reduced eGFR                      | 2.11 | 1.44     | 3.09  | p < 0.001 |
| RBC                               | 0.65 | 0.41     | 1.00  | p = 0.052 |
| Hb                                | 1.02 | 0.88     | 1.19  | p = 0.792 |

Legend: reduced LVEF (<40%); reduced GFR calculated with CKDEPI (< 60 mL/min); RBC, red blood cells; Hb, haemoglobin.

**Supplementary Table S2 adjusted Cox regression analysis for the composite outcome. A) Model 1, adjusted for age and reduced LVEF (<40%) B) Model 2, adjusted for age, reduced LVEF and reduced eGFR (< 60 mL/min calculated with CKDEPI) C) Model 3, adjusted for age, reduced LVEF, reduced eGFR, Hb and RBC.**

**A) Model 1**

|                                   | HR   | 95,0% CI |       | p value   |
|-----------------------------------|------|----------|-------|-----------|
|                                   |      | Lower    | Upper |           |
| Age                               | 1.03 | 1.02     | 1.05  | p < 0.001 |
| LVEF                              | 0.98 | 0.71     | 1.36  | p = 0.92  |
| Lowest RDW tertile ( <i>ref</i> ) |      |          |       |           |
| Intermediate RDW tertile          | 1.15 | 0.80     | 1.67  | p = 0.439 |
| Highest RDW tertile               | 2.45 | 1.73     | 3.47  | p < 0.001 |

**B) Model 2**

|                                   | HR    | 95,0% CI |       | p value   |
|-----------------------------------|-------|----------|-------|-----------|
|                                   |       | Lower    | Upper |           |
| Age                               | 1.02  | 1.01     | 1.04  | p < 0.001 |
| LVEF                              | 0.942 | 0.68     | 1.31  | p = 0.720 |
| Lowest RDW tertile ( <i>ref</i> ) |       |          |       |           |
| Intermediate RDW tertile          | 1.09  | 0.75     | 1.59  | p = 0.638 |
| Highest RDW tertile               | 2.13  | 1.49     | 3.01  | p < 0.001 |
| eGFR                              | 1.86  | 1.40     | 2.48  | p < 0.001 |

**C) Model 3**

|                                   | HR   | 95,0% CI |       | p value   |
|-----------------------------------|------|----------|-------|-----------|
|                                   |      | Lower    | Upper |           |
| Age                               | 1.02 | 1.01     | 1.03  | p = 0.001 |
| LVEF                              | 0.99 | 0.67     | 1.29  | p = 0.657 |
| Lowest RDW tertile ( <i>ref</i> ) |      |          |       |           |
| Intermediate RDW tertile          | 1.13 | 0.78     | 1.63  | p = 0.532 |
| Highest RDW tertile               | 2.23 | 1.53     | 3.24  | p < 0.001 |
| eGFR                              | 1.68 | 1.24     | 2.26  | p = 0.001 |
| RBC                               | 0.71 | 0.51     | 0.98  | p = 0.039 |
| Hb                                | 1.04 | 0.93     | 1.16  | p = 0.503 |

Legend: reduced LVEF (<40%); reduced eGFR calculated with CKDEPI (< 60 mL/min); RBC, red blood cells; Hb, haemoglobin.
